# Supplementary material for: The use of infrared thermography for non-invasive detection of bleeding and musculoskeletal abnormalities in patients with hemophilia: an observational study
Source: PubMed Central journal article supplement (PMC10303282; doi:10.1186/s12959-023-00511-5), 2023-06-28

Thermal image

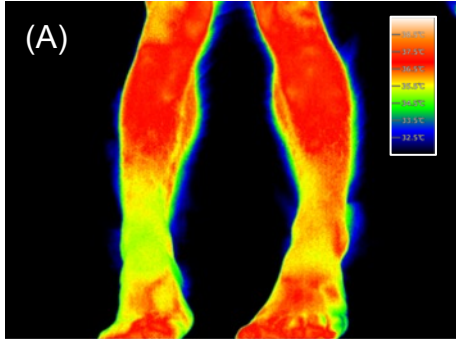

Analysis image

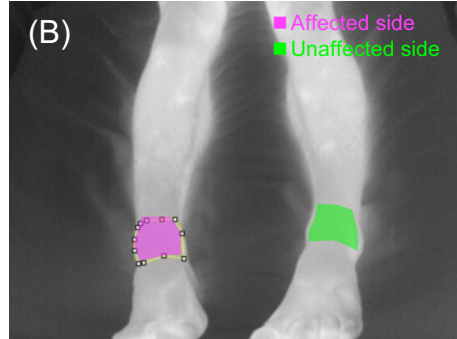

Supplement: 12959_2023_511_MOESM1_ESM.pdf [file 12959_2023_511_MOESM1_ESM.pdf]
